# Supplementary material for: The Diagnostic Accuracy of PIK3CA Mutations by circulating tumor DNA (ctDNA) in Breast Cancer: An Individual Patient Data Meta-analysis
Source: Research Square preprint supplement (doi:10.21203/rs.3.rs-1462801/v1), 2022-03-21

**Additional Figure 5:** Deeks' funnel plot asymmetry test was tested to evaluate publication bias. Circles represent studies included in the meta-analysis. ESS, effective sample size.


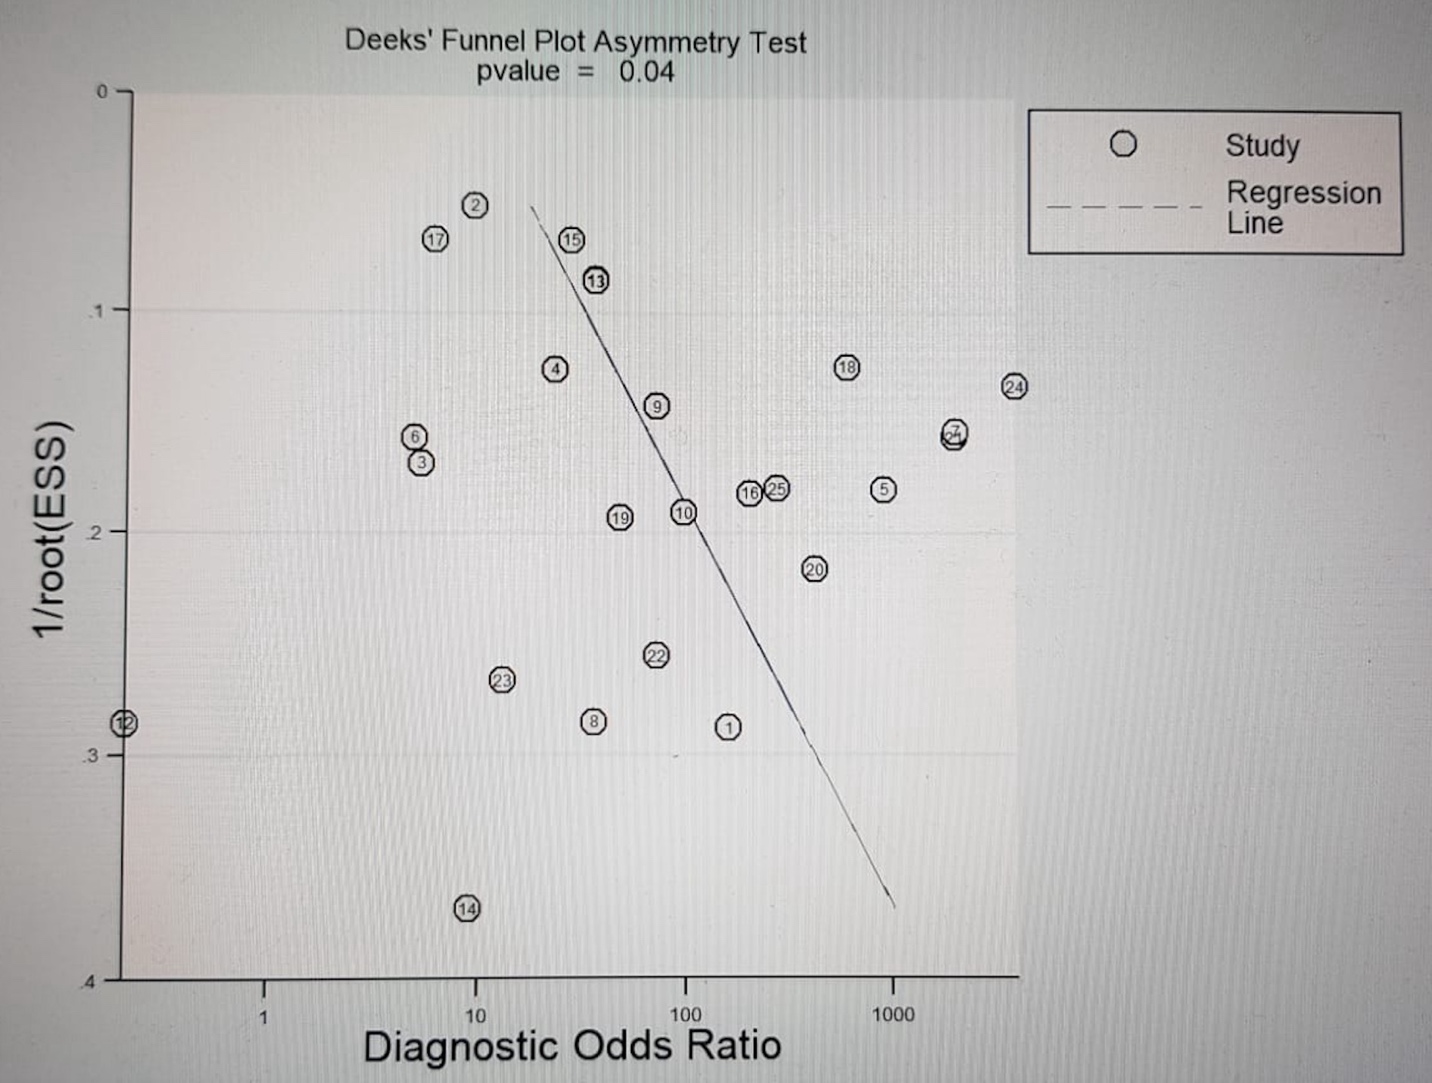

Supplement: Supplementary file 1 [file 4dbbccf5a5667c12967ab70e.docx]
