# Supplementary material for: The Diagnostic Accuracy of PIK3CA Mutations by circulating tumor DNA (ctDNA) in Breast Cancer: An Individual Patient Data Meta-analysis
Source: Research Square preprint supplement (doi:10.21203/rs.3.rs-1462801/v1), 2022-03-21
Supplement: Supplementary file 3 [file ac333689577eb336fb085389.docx]

**Additional Figure 7:** The diagnostic accuracy performance according to low-size subgroup.

**Summary Sensitivity**

Study | Sen [95% Conf. Iterval.] TP/(TP+FN) TN/(TN+FP)

--------------------------------------------------------------------------------------------

Chung 2017 | 1,000 0,292 - 1,000 3/3 11/11

Dawson 2013 | 1,000 0,735 - 1,000 12/12 18/18

Rothe 2014 | 0,750 0,194 - 0,994 3/4 12/13

Shatsky 2019 | 0,778 0,400 - 0,972 7/9 28/29

Tsanikou 2018 | 0,385 0,139 - 0,684 5/13 0/3

Olivera 2019 | 0,762 0,528 - 0,918 16/21 1/1

Blackwell 2015 | 0,944 0,727 - 0,999 17/18 12/13

Takano 2018 | 0,600 0,262 - 0,878 6/10 16/16

Slembrouck 2019 | 1,000 0,631 - 1,000 8/8 12/12

Perkins 2012 | 0,750 0,194 - 0,994 3/4 15/15

Ma 2017 | 0,500 0,118 - 0,882 3/6 6/6

Beaver 2014 | 0,929 0,661 - 0,998 13/14 15/15

--------------------------------------------------------------------------------------------

**Pooled Sen | 0,787 0,704 - 0,856**

--------------------------------------------------------------------------------------------

Heterogeneity chi-squared = 30,79 (d.f.= 11) p = 0,001

Inconsistency (I-square) = 64,3 %

No. studies = 12.

Filter ON (Size = 1 )

Add 1/2 to all cells of the studies with zero

**Summary Specificity**

Study | Spe [95% Conf. Iterval.] TP/(TP+FN) TN/(TN+FP)

--------------------------------------------------------------------------------------------

Chung 2017 | 1,000 0,715 - 1,000 3/3 11/11

Dawson 2013 | 1,000 0,815 - 1,000 12/12 18/18

Rothe 2014 | 0,923 0,640 - 0,998 3/4 12/13

Shatsky 2019 | 0,966 0,822 - 0,999 7/9 28/29

Tsanikou 2018 | 0,000 0,000 - 0,708 5/13 0/3

Olivera 2019 | 1,000 0,025 - 1,000 16/21 1/1

Blackwell 2015 | 0,923 0,640 - 0,998 17/18 12/13

Takano 2018 | 1,000 0,794 - 1,000 6/10 16/16

Slembrouck 2019 | 1,000 0,735 - 1,000 8/8 12/12

Perkins 2012 | 1,000 0,782 - 1,000 3/4 15/15

Ma 2017 | 1,000 0,541 - 1,000 3/6 6/6

Beaver 2014 | 1,000 0,782 - 1,000 13/14 15/15

--------------------------------------------------------------------------------------------

**Pooled Spe | 0,961 0,916 - 0,985**

--------------------------------------------------------------------------------------------

Heterogeneity chi-squared = 27,74 (d.f.= 11) p = 0,004

Inconsistency (I-square) = 60,4 %

No. studies = 12.

Filter ON (Size = 1 )

Add 1/2 to all cells of the studies with zero

**Summary Positive Likelihood Ratio (Random effects model)**

Study | LR+ [95% Conf. Iterval.] % Weight

--------------------------------------------------------------------------------------------

Chung 2017 | 21,000 1,358 - 324,78 7,78

Dawson 2013 | 36,538 2,366 - 564,32 7,78

Rothe 2014 | 9,750 1,365 - 69,652 8,96

Shatsky 2019 | 22,556 3,186 - 159,70 8,98

Tsanikou 2018 | 0,449 0,212 - 0,950 10,41

Olivera 2019 | 3,000 0,269 - 33,487 8,28

Blackwell 2015 | 12,278 1,861 - 80,980 9,08

Takano 2018 | 20,091 1,253 - 322,12 7,72

Slembrouck 2019 | 24,556 1,613 - 373,73 7,80

Perkins 2012 | 22,400 1,379 - 363,91 7,70

Ma 2017 | 7,000 0,438 - 111,91 7,72

Beaver 2014 | 28,800 1,872 - 443,08 7,78

--------------------------------------------------------------------------------------------

**(REM) pooled LR+ | 10,680 2,482 - 45,946**

--------------------------------------------------------------------------------------------

Heterogeneity chi-squared = 65,01 (d.f.= 11) p = 0,000

Inconsistency (I-square) = 83,1 %

Estimate of between-study variance (Tau-squared) = 5,1759

No. studies = 12.

Filter ON (Size = 1 )

Add 1/2 to all cells of the studies with zero

**Summary Negative Likelihood Ratio (Random effects model)**

Study | LR- [95% Conf. Iterval.] % Weight

--------------------------------------------------------------------------------------------

Chung 2017 | 0,130 0,010 - 1,748 3,73

Dawson 2013 | 0,040 0,003 - 0,599 3,45

Rothe 2014 | 0,271 0,049 - 1,489 7,10

Shatsky 2019 | 0,230 0,068 - 0,783 10,63

Tsanikou 2018 | 4,857 0,351 - 67,172 3,65

Olivera 2019 | 0,333 0,113 - 0,981 12,06

Blackwell 2015 | 0,060 0,009 - 0,407 6,03

Takano 2018 | 0,421 0,206 - 0,862 16,33

Slembrouck 2019 | 0,058 0,004 - 0,856 3,50

Perkins 2012 | 0,310 0,081 - 1,185 9,61

Ma 2017 | 0,538 0,250 - 1,162 15,66

Beaver 2014 | 0,103 0,023 - 0,472 8,26

--------------------------------------------------------------------------------------------

**(REM) pooled LR- | 0,268 0,155 - 0,463**

--------------------------------------------------------------------------------------------

Heterogeneity chi-squared = 19,20 (d.f.= 11) p = 0,058

Inconsistency (I-square) = 42,7 %

Estimate of between-study variance (Tau-squared) = 0,3460

No. studies = 12.

Filter ON (Size = 1 )

Add 1/2 to all cells of the studies with zero

**Summary Diagnostic Odds Ratio (Random effects model)**

Study | DOR [95% Conf. Iterval.] % Weight

--------------------------------------------------------------------------------------------

Chung 2017 | 161,00 2,672 - 9700,0 6,77

Dawson 2013 | 925,00 17,197 - 49755,6 6,97

Rothe 2014 | 36,000 1,710 - 757,80 8,93

Shatsky 2019 | 98,000 7,734 - 1241,8 10,16

Tsanikou 2018 | 0,092 0,004 - 2,160 8,69

Olivera 2019 | 9,000 0,318 - 254,72 8,27

Blackwell 2015 | 204,00 11,582 - 3593,0 9,35

Takano 2018 | 47,667 2,236 - 1016,1 8,90

Slembrouck 2019 | 425,00 7,664 - 23569,5 6,92

Perkins 2012 | 72,333 2,404 - 2176,8 8,13

Ma 2017 | 13,000 0,511 - 330,48 8,50

Beaver 2014 | 279,00 10,470 - 7434,9 8,40

--------------------------------------------------------------------------------------------

**(REM) pooled DOR | 48,420 11,386 - 205,92**

--------------------------------------------------------------------------------------------

Heterogeneity chi-squared = 25,72 (d.f.= 11) p = 0,007

Inconsistency (I-square) = 57,2 %

Estimate of between-study variance (Tau-squared) = 3,6897

No. studies = 12.

Filter ON (Size = 1 )

Add 1/2 to all cells of the studies with zero

**Analysis of Diagnostic Threshold**

--------------------------------------------------------------------------------

Spearman correlation coefficient: -0,345 p-value= 0,272

(Logit(TPR) vs Logit(FPR)

--------------------------------------------------------------------------------

Moses' model (D = a + bS)

Weighted regression (Inverse Variance)

Var Coeff. Std. Error T p-value

--------------------------------------------------------------------------------

a 3,177 0,881 3,607 0,0048

b( 1) -0,616 0,503 1,223 0,2493

--------------------------------------------------------------------------------

Tau-squared estimate = 2,6481 (Convergence is achieved after 5 iterations)

Restricted Maximum Likelihood estimation (REML)

No. studies = 12

Filter ON (Size = 1 )

Add 1/2 to all cells of the studies with zero
