# Supplementary material for: The Diagnostic Accuracy of PIK3CA Mutations by circulating tumor DNA (ctDNA) in Breast Cancer: An Individual Patient Data Meta-analysis
Source: Research Square preprint supplement (doi:10.21203/rs.3.rs-1462801/v1), 2022-03-21
Supplement: Supplementary file 4 [file b28d9c91e00766ff02967378.docx]

**Additional Table 4a:** TP (a), FP (b), FN (c), and TN (d) by hotspot mutation.

| **STUDY** | **a** | **b** | **c** | **d** |
| --- | --- | --- | --- | --- |
| **Chung** | 3 | 0 | 0 | 11 |
| **Chung**  **(H1047L)** | 2 | 0 | 0 | 12 |
| **Chung**  **(E545K)** | 1 | 0 | 0 | 13 |
| **Higgins (r)** | 14 | 0 | 0 | 35 |
| **Higgins (r)**  **(H1047 L/R)** | 11 | 0 | 0 | 38 |
| **Higgins (r)**  **(E545K)** | 3 | 0 | 0 | 46 |
| **Higgins (p)** | 8 | 8 | 6 | 29 |
| **Higgins (p)**  **(H1047R)** | 8 | 3 | 2 | 38 |
| **Higgins (p)**  **(E542K/E545K)** | 0 | 4 | 4 | 39 |
| **Rothe** | 3 | 1 | 1 | 12 |
| **Rothe**  **(H1047L/R)** | 2 | 0 | 1 | 14 |
| **Rothe**  **(E543K/E545K)** | 1 | 1 | 0 | 15 |
| **Garcia-Saenz** | 11 | 0 | 9 | 29 |
| **Garcia-Saenz**  **(H1047R)** | 5 | 0 | 6 | 38 |
| **Garcia-Saenz**  **(E542K/E545K)** | 6 | 0 | 3 | 40 |
| **Shatsky** | 7 | 1 | 2 | 28 |
| **Shatsky**  **(H1047L/R)** | 3 | 0 | 0 | 35 |
| **Shatsky**  **(E542K/E545K)** | 4 | 0 | 2 | 32 |
| **Spoerke** | 50 | 7 | 14 | 71 |
| **Spoerke**  **(H1047L/R)** | 28 | 3 | 11 | 100 |
| **Spoerke**  **(E542K/E545K/G)** | 21 | 8 | 5 | 108 |
| **Tzanikou** | 5 | 2 | 8 | 1 |
| **Tzanikou**  **(H1047R)** | 2 | 3 | 9 | 2 |
| **Tzanikou**  **(E545K)** | 4 | 3 | 5 | 4 |
| **Moreno**  **(a)+(b)** | 19 | 0 | 3 | 54 |
| **Moreno**  **(a)+(b)**  **(H1047R)** | 13 | 0 | 1 | 62 |
| **Slembrouck** | 8 | 0 | 0 | 12 |
| **Slembrouck**  **(E542K/E545K)** | 6 | 3 | 1 | 10 |
| **Slembrouck**  **(H1047L)** | 1 | 0 | 0 | 19 |
| **Perkins**  **(breast cohort)** | 3 | 0 | 1 | 15 |
| **Perkins**  **(breast cohort)**  **(H1047R)** | 3 | 0 | 1 | 15 |
| **Beaver** | 13 | 0 | 1 | 15 |
| **Beaver**  **(H1047R)** | 10 | 0 | 0 | 19 |
| **Beaver**  **(E545K)** | 4 | 0 | 1 | 24 |

**eTable 4b:** Sensitivity, specificity, concordance, NPV, and PPV rates related to exons 9 and 20 hotspot mutations.

| **STUDY**  **(R/retrosp.**  **P/prosp)** | **N° OF PTS** | **SENSITIVITY**  **(%)** | **SPECIFICITY**  **(%)** | **CONCORDANCE**  **(%)** | **NPV**  **(%)** | **PPV**  **(%)** |
| --- | --- | --- | --- | --- | --- | --- |
| **Chung** | 14 | 100 % | 100 % | 93,3 % | 100 % | 100 % |
| **Chung**  **(H1047L/R)** | 14 | 100 % | 100 % | 100 % | 100 % | 100 % |
| **Chung**  **(E545K)** | 14 | 100 % | 100 % | 100 % | 100 % | 100 % |
| **Higgins (r)** | 49 | 100 % | 100 % | 100 % | 100 % | 100 % |
| **Higgins (r)**  **(H1047L/R)** | 49 | 100 % | 100 % | 100 % | 100 % | 100 % |
| **Higgins (r)**  **(E545K)** | 49 | 100 % | 100 % | 100 % | 100 % | 100 % |
| **Higgins (p)** | 51 | 57,1 % | 78,4 % | 72,5 % | 82,9 % | 50 % |
| **Higgins (p)**  **(H1047R)** | 51 | 80 % | 92,7 % | 90,2 % | 95 % | 72,7 % |
| **Higgins (p)**  **(E542K/E545K)** | 51 | 0 % | 90,7 % | 83 % | 90,7 % | 0 % |
| **Rothe** | 17 | 75 % | 92,3 % | 88,2 % | 92,3 % | 79 % |
| **Rothe**  **(H1047L/R)** | 17 | 66,7 % | 100 % | 94,1 % | 93,3 % | 100 % |
| **Rothe**  **(E543K/E545K)** | 17 | 100 % | 93,8 % | 94,1 % | 100 % | 50 % |
| **Garcia-Saenz** | 49 | 55 % | 100 % | 81,6 % | 76,3 % | 100 % |
| **Garcia-Saenz**  **(H1047R)** | 49 | 45,5 % | 100 % | 87,8 % | 86,4 % | 100 % |
| **Garcia-Saenz**  **(E542K/E545K)** | 49 | 66,7 % | 100 % | 94 % | 93 % | 100 % |
| **Shatsky** | 38 | 77,8 % | 96,6 % | 92,1 % | 93,3 % | 87,5 % |
| **Shatsky**  **(H1047L/R)** | 38 | 100 % | 100 % | 100 % | 100 % | 100 % |
| **Shatsky**  **(E542K/E545K)** | 38 | 66,7 % | 100 % | 94,7 % | 94,1 % | 100 % |
| **Spoerke** | 142 | 78,1 % | 91 % | 80,5 % | 83,5 % | 87,7 % |
| **Spoerke**  **(H1047L/R)** | 142 | 71,8 % | 97,1 % | 90,1 % | 90,1 % | 90,3 % |
| **Spoerke**  **(E542K/E545K/G)** | 142 | 80,8 % | 93,1 % | 90,8 % | 95,6 % | 72,4 % |
| **Tzanikou** | 16 | 38,5 % | 50 % | 37,3 % | 11,1 % | 71,4 % |
| **Tzanikou**  **(H1047R)** | 16 | 18,2 % | 40 % | 25 % | 18,2 % | 40 % |
| **Tzanikou**  **(E545K)** | 16 | 44,4 % | 57,1 % | 50 % | 44,4 % | 57,1 % |
| **Moreno**  **(a)+(b)** | 76 | 86,4 % | 100 % | 96,1 % | 94,7 % | 100 % |
| **Moreno**  **(a)+(b)**  **(H1047R)** | 76 | 92,9 % | 100 % | 98,7 % | 98,4 % | 100 % |
| **Slembrouck** | 20 | 100 % | 100 % | 100 % | 100 % | 100 % |
| **Slembrouck**  **(E542K/E545K)** | 20 | 85,7 | 76,9 | 80 | 90,9 | 66,7 |
| **Slembrouck**  **(H1047L)** | 20 | 100 % | 100 % | 100 % | 100 % | 100 % |
| **Perkins**  **(breast cohort)** | 19 | 75 % | 100 % | 100 % | 93,8 % | 100 % |
| **Perkins**  **(breast cohort)**  **(H1047R)** | 19 | 75 % | 100 % | 100 % | 93,8 % | 100 % |
| **Beaver** | 29 | 92,9 % | 100 % | 96,6 % | 93,8 % | 100 % |
| **Beaver**  **(H1047R)** | 29 | 100 % | 100 % | 100 % | 100 % | 100 % |
| **Beaver**  **E545K** | 29 | 80 % | 100 % | 96,6 % | 96 % | 100 % |
