# Supplementary material for: The Diagnostic Accuracy of PIK3CA Mutations by circulating tumor DNA (ctDNA) in Breast Cancer: An Individual Patient Data Meta-analysis
Source: Research Square preprint supplement (doi:10.21203/rs.3.rs-1462801/v1), 2022-03-21
Supplement: Supplementary file 5 [file c1e08948a6cbd5d7d506f06a.docx]

**Additional Table 9:** TP (a), FP (b), FN (c), and TN (d) related to the studies reporting either directly the median ctDNA MAF value or enough data to allow a calculation.

| **STUDY** | **MAF**  **(%)** | **a** | **b** | **c** | **d** |
| --- | --- | --- | --- | --- | --- |
| **Beaver** | Median =  0,02 %  Media =  0,24 % | 13 | 0 | 1 | 15 |
| **Spoerke** | Median =  2,43 %  Media =  6,51 %  (all popul.) | 50 | 7 | 14 | 71 |
| **Chung** | Median =  2,8 %  Media =  2,63 % | 3 | 0 | 0 | 11 |
| **Rothe** | Median =  2,8 %  Media =  4,5 % | 3 | 1 | 1 | 12 |
| **Moreno**  **(a)+(b)** | Median =  3 %  Media =  17,5 % | 19 | 0 | 3 | 54 |
| **Dawson** | Median =  4 %  (all  mutations) | 12 | 0 | 0 | 18 |
| **Shatsky** | Median =  9,6 %  Media =  17,6 % | 7 | 1 | 2 | 28 |
