# Supplementary material for: The Diagnostic Accuracy of PIK3CA Mutations by circulating tumor DNA (ctDNA) in Breast Cancer: An Individual Patient Data Meta-analysis
Source: Research Square preprint supplement (doi:10.21203/rs.3.rs-1462801/v1), 2022-03-21

**Additional Figure 11:** (a) Forest plots of the sensitivity and specificity in detecting PIK3CA mutations by low-time elapsed between tissue and plasma samples collection, and related sROC curve. (b) Forest plots of the sensitivity and specificity in detecting PIK3CA mutations by high-time elapsed between tissue and plasma samples collection, and related sROC curve. The different circle size indicates the different study weight.


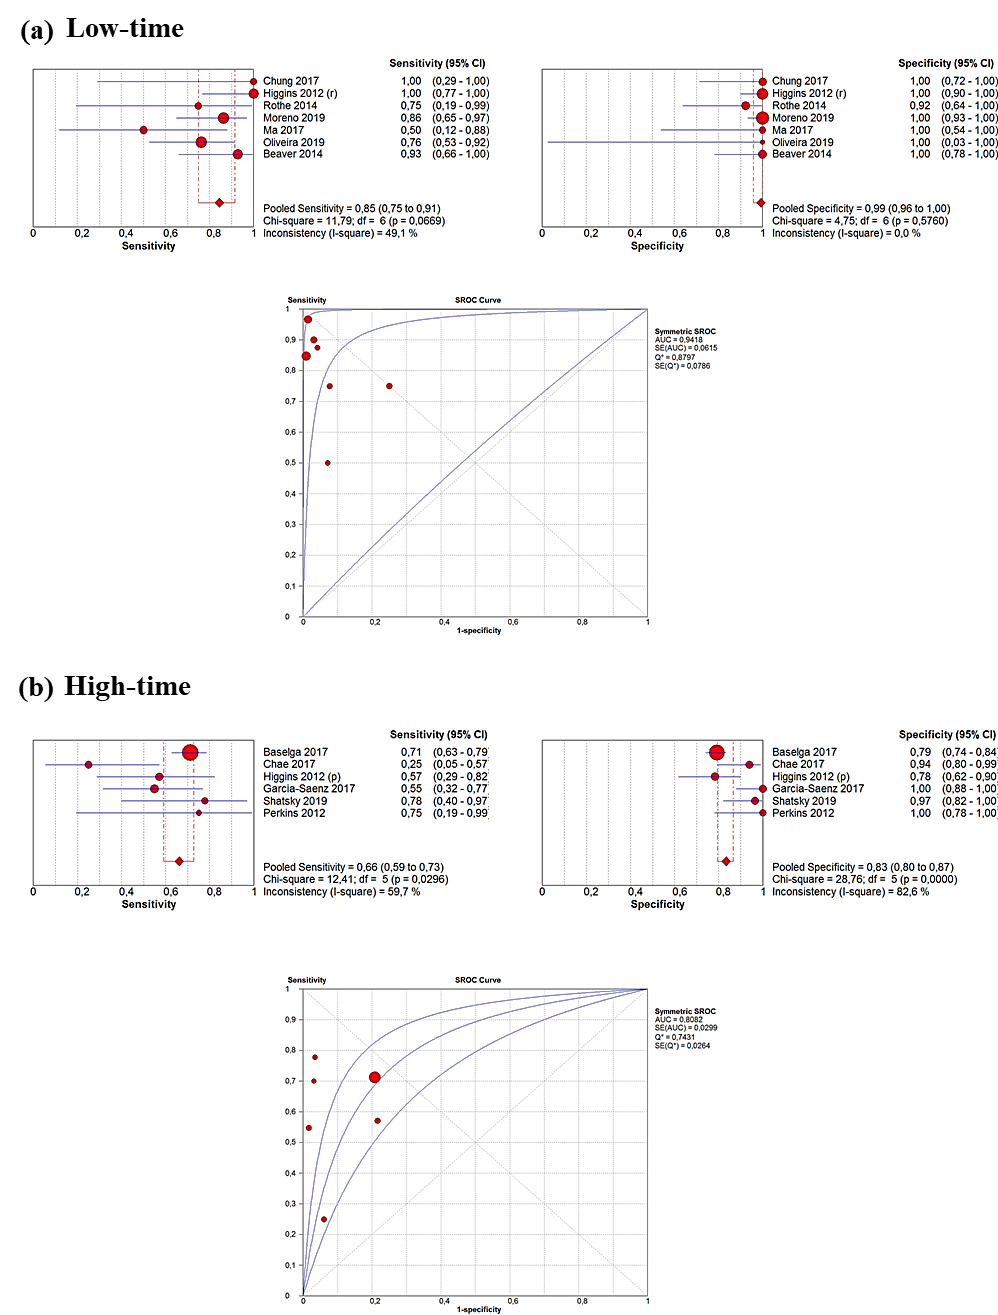

Supplement: Supplementary file 6 [file c29c97834b31322724badbbd.docx]
